# Supplementary material for: Clinical Pharmacokinetics of Oral Sodium Selenite and Dosing Implications in the Treatment of Patients with Metastatic Cancer
Source: PubMed Central journal article supplement — Drugs R D. 2021 Apr 17;21(2):169–78. doi: 10.1007/s40268-021-00340-9 (PMC8206290; doi:10.1007/s40268-021-00340-9), 2021-04-17
Supplement: 40268_2021_340_MOESM2_ESM.pdf [file 40268_2021_340_MOESM2_ESM.pdf]

**Supplementary Tab 1 Patient demographics** Summary of demographics per dosing cohort for all fifteen study subjects.

| Characteristic               | Cohort 1      | Cohort 2      | Cohort 3      | Cohort 4      | Cohort 5       |
|------------------------------|---------------|---------------|---------------|---------------|----------------|
| No. subjects                 | 3             | 3             | 3             | 5             | 1              |
| Dose (mg)                    | 5.5           | 11            | 16.5          | 33            | 49.5           |
| Age (years),<br>median (IQR) | 79<br>(78-86) | 75<br>(73-79) | 68<br>(67-68) | 57<br>(37-67) | 56<br>(56 -56) |
| Weight (kg),<br>median (IQR) | 93<br>(88-98) | 78<br>(67-93) | 68<br>(66-81) | 70<br>(69-78) | 71<br>(71 -71) |
